# Supplementary material
Source: Royal Society of Chemistry journal article supplement (doi:10.1039/d5nj04137f)
Supplement: d5nj04137f1.pdf [file d5nj04137f1.pdf]

## Electronic Supplementary Information – First-principles study on structural, electronic, magnetic and optical properties of lithium zinc ferrite $\text{Li}_{1-x}\text{Zn}_{2x}\text{Fe}_{5-x}\text{O}_8$

U-Song Jon, Un-Song Ri, Song-Chol Ri, Chol-Jin Ku, Chong-Suk Ri and Chol-Jun Yu\*

*Faculty of Materials Science, Kim Il Sung University, Taesong District, Pyongyang,  
 Democratic People's Republic of Korea.*

Table S1. Lattice constants ( $a$ ) and total magnetization ( $M_{\text{tot}}$ ) per formula unit (fu) in  $\text{Li}_{1-x}\text{Zn}_{2x}\text{Fe}_{5-x}\text{O}_8$  ( $x = 0, 0.25, 0.5, 0.75, 1$ ) with ferrimagnetic (FIM) or antiferromagnetic (AFM) order.

| Compound | $x$  | Magnetic order | $a$ (Å) | $M_{\text{tot}}$ ( $\mu_{\text{B}}/\text{fu}$ ) |
|----------|------|----------------|---------|-------------------------------------------------|
| LFO      | 0    | FIM            | 8.302   | 2.48                                            |
| LZFO-1   | 0.25 | FIM            | 8.333   | 3.82                                            |
| LZFO-2   | 0.5  | FIM            | 8.362   | 4.16                                            |
| LZFO-3   | 0.75 | FIM            | 8.386   | 0.59                                            |
| ZFO      | 1.0  | AFM            | 8.417   | 0.00                                            |

Table S2. Number of metal cations at A and B sites in the unit cell for Li-Zn ferrites  $(\text{Zn}_x\text{Fe}_{1-x})^{\text{A}}(\text{Li}_{(1-x)/2}\text{Fe}_{(3+x)/2})^{\text{B}}\text{O}_4$  ( $x = 0, 0.25, 0.5, 0.75, 1$ ).

|        | $x$  | $\text{Zn}_{\text{A}}$ | $\text{Fe}_{\text{A}}$ | $\text{Fe}_{\text{B}}$ | $\text{Li}_{\text{B}}$ |
|--------|------|------------------------|------------------------|------------------------|------------------------|
| LFO    | 0    | 0                      | 8                      | 12                     | 4                      |
| LZFO-1 | 0.25 | 2                      | 6                      | 13                     | 3                      |
| LZFO-2 | 0.5  | 4                      | 4                      | 14                     | 2                      |
| LZFO-3 | 0.75 | 6                      | 2                      | 15                     | 1                      |
| ZFO    | 1    | 8                      | 0                      | 16                     | 0                      |

Table S3. DFT total energies ( $E_{\text{tot}}$ ) of non-magnetic (NM), ferromagnetic (FM) and antiferromagnetic (AFM) phases, the nearest neighbours (nn) for  $\text{AB}'$  ( $n_{\text{AB}'}$ ),  $\text{B}'\text{A}$  ( $n_{\text{B}'\text{A}}$ ) and  $\text{B}'\text{B}''$  ( $n_{\text{B}'\text{B}''}$ ) pairs, and Fe ion numbers in A ( $L_{\text{A}}$ ), B' ( $L_{\text{B}'}$ ) and B'' ( $L_{\text{B}''}$ ) sublattices for  $\text{Li}_{1-x}\text{Zn}_{2x}\text{Fe}_{5-x}\text{O}_8$  ( $x = 0, 0.25, 0.5, 0.75, 1.0$ ).

|        | $x$  | $E_{\text{tot}}$ (Ry) |              |              | nn numbers       |                         |                           | Fe numbers     |                 |                  |
|--------|------|-----------------------|--------------|--------------|------------------|-------------------------|---------------------------|----------------|-----------------|------------------|
|        |      | NM                    | FM           | AFM          | $n_{\text{AB}'}$ | $n_{\text{B}'\text{A}}$ | $n_{\text{B}'\text{B}''}$ | $L_{\text{A}}$ | $L_{\text{B}'}$ | $L_{\text{B}''}$ |
| LFO    | 0    | -6097.811503          | -6100.605220 | -6101.056630 | 4.500            | 6.000                   | 2.2500                    | 8              | 12              | 0                |
| LZFO-1 | 0.25 | -6756.454446          | -6759.106832 | -6759.448410 | 4.875            | 4.500                   | 2.4375                    | 6              | 7               | 6                |
| LZFO-2 | 0.5  | -7415.174267          | -7417.658921 | -7417.886246 | 5.250            | 3.000                   | 2.6250                    | 4              | 7               | 7                |
| LZFO-3 | 0.75 | -8073.901999          | -8076.194359 | -8076.288529 | 5.625            | 1.500                   | 2.8125                    | 2              | 8               | 7                |
| ZFO    | 1    | -8732.645535          | -8734.791745 | -8734.823662 | 6.000            | 0.000                   | 3.0000                    | 0              | 0               | 16               |

\*Chol-Jun Yu, Email: cj.yu@ryongnamsan.edu.kp

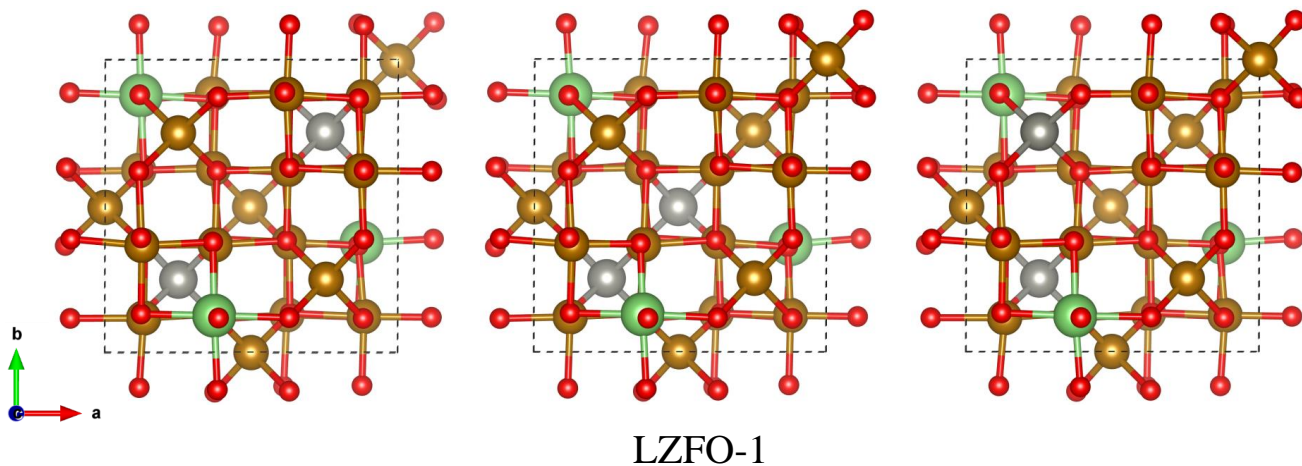

Fig. S1 Ball-and-stick views for possible crystalline structures of LZFO-1 ( $\text{Li}_{0.75/2}\text{Zn}_{0.25}\text{Fe}_{4.75/2}\text{O}_4$ ). The green, brown and red balls stand for Li, Fe and O atoms, respectively.

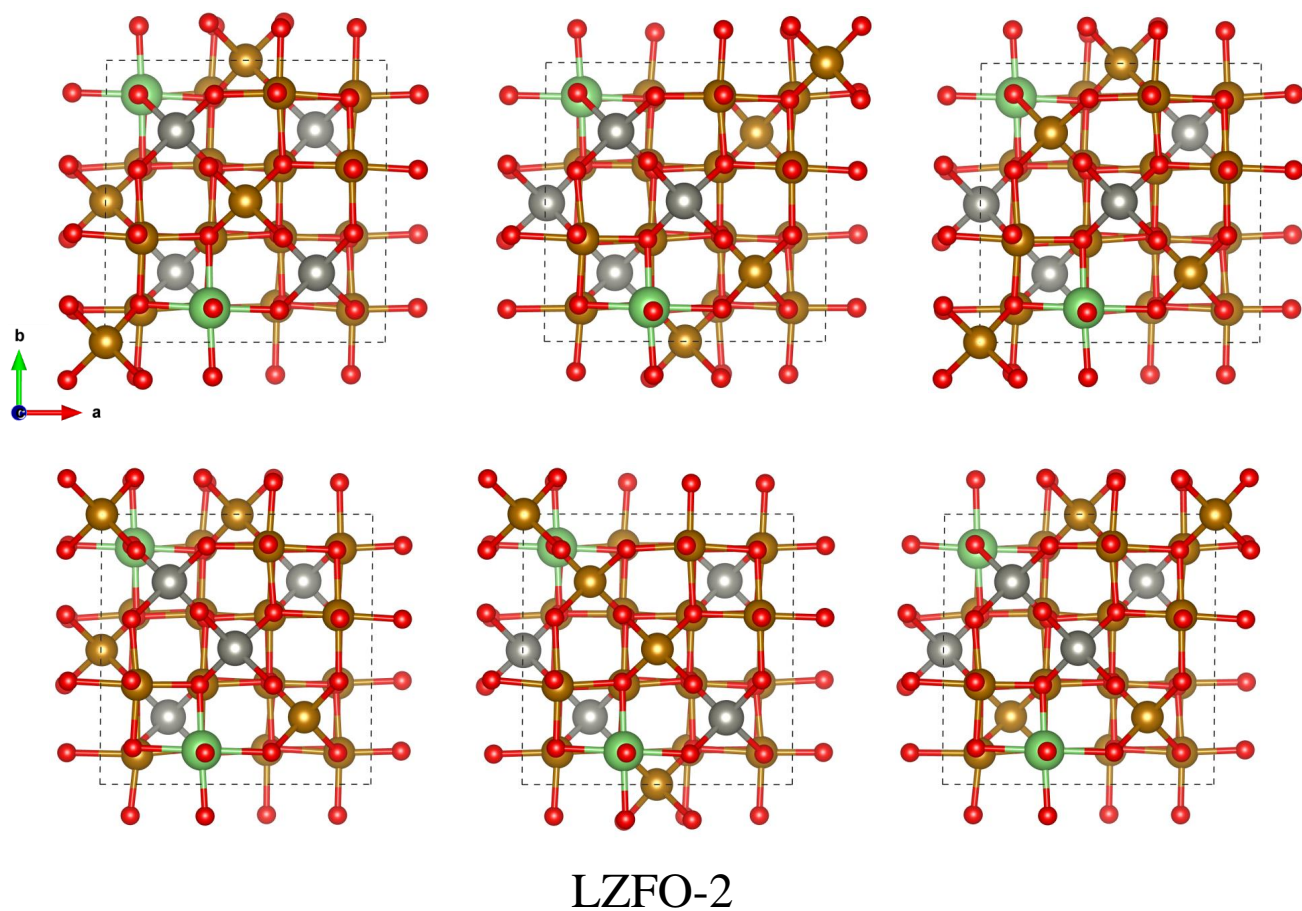

Fig. S2 Ball-and-stick views for possible crystalline structures of LZFO-2 ( $\text{Li}_{0.5/2}\text{Zn}_{0.5}\text{Fe}_{4.5/2}\text{O}_4$ ). The green, brown and red balls stand for Li, Fe and O atoms, respectively.

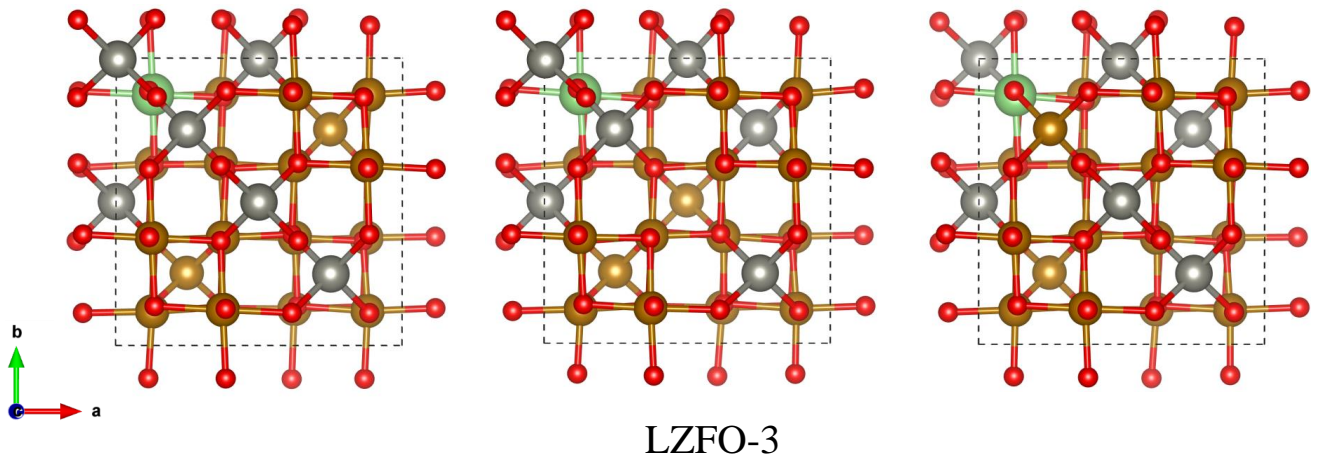

Fig. S3 Ball-and-stick views for possible crystalline structures of LZFO-3 ( $\text{Li}_{0.25/2}\text{Zn}_{0.75}\text{Fe}_{4.25/2}\text{O}_4$ ). The green, brown and red balls stand for Li, Fe and O atoms, respectively.

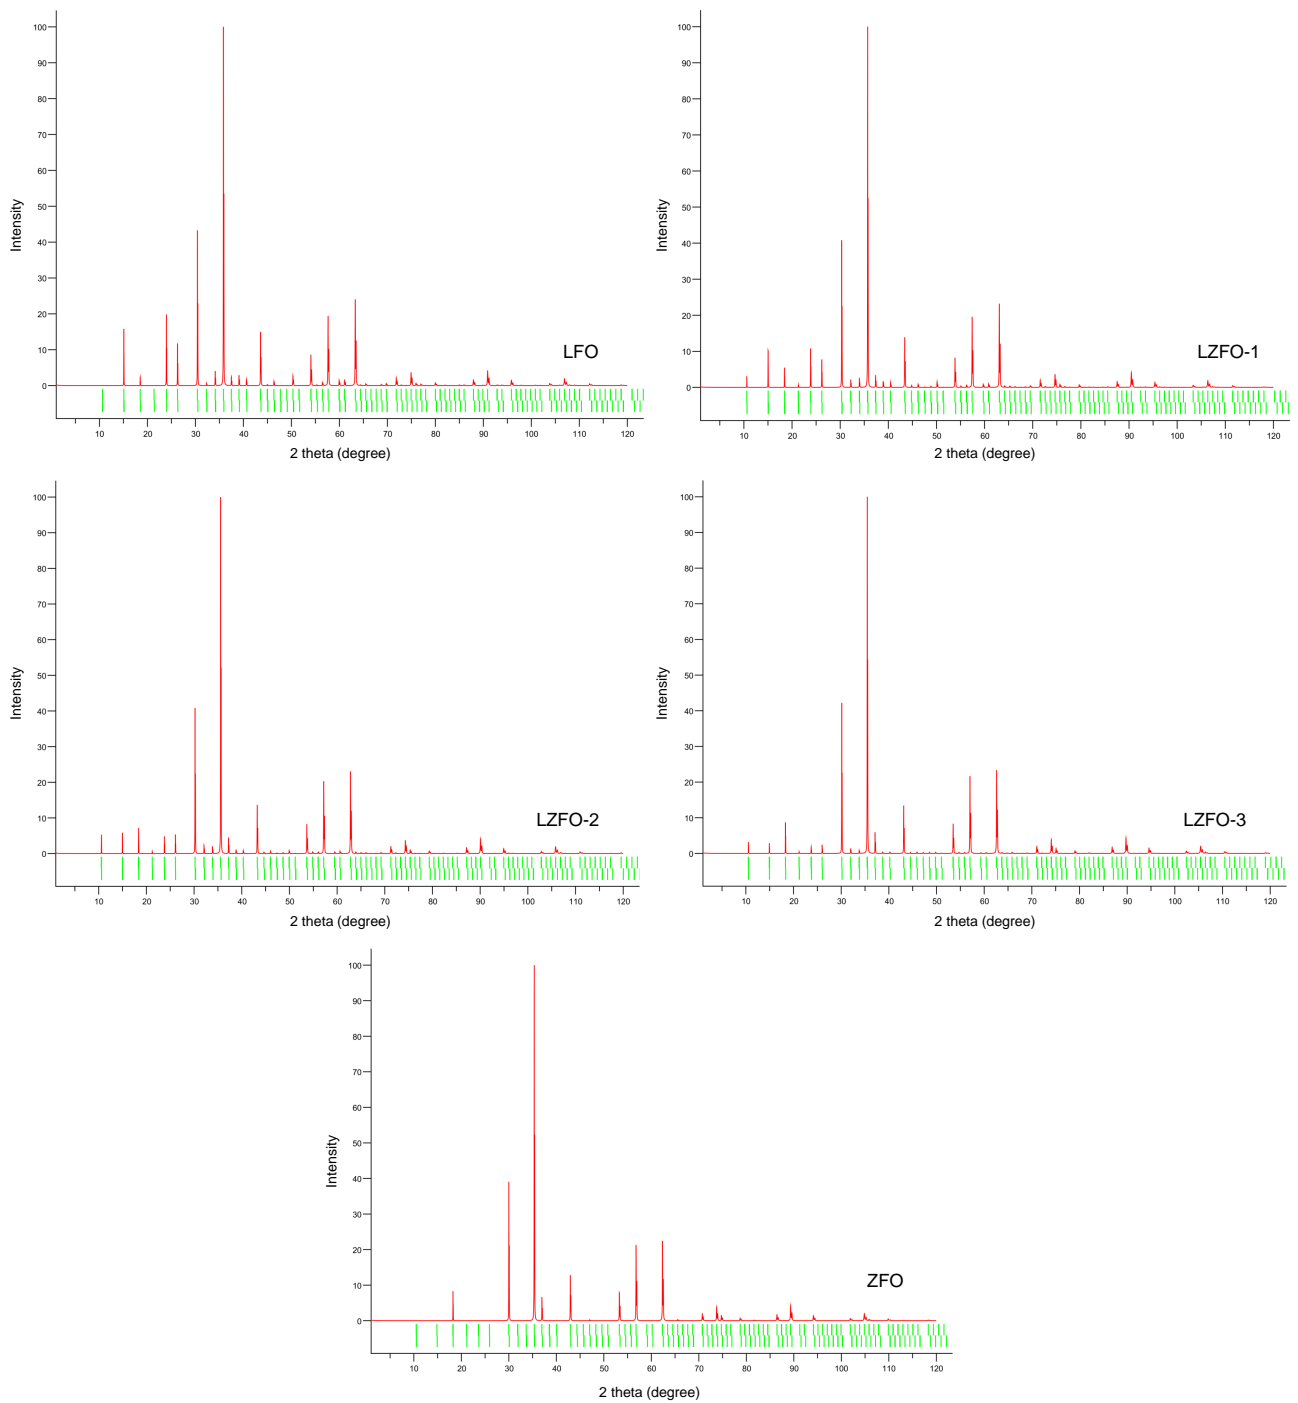

Fig. S4 X-ray diffraction patterns of optimized unit cells for Li-Zn ferrites  $\text{Li}_{1-x}\text{Zn}_{2x}\text{Fe}_{5-x}\text{O}_8$  ( $x = 0, 0.25, 0.5, 0.75, 1$ ) simulated by using the VESTA code.

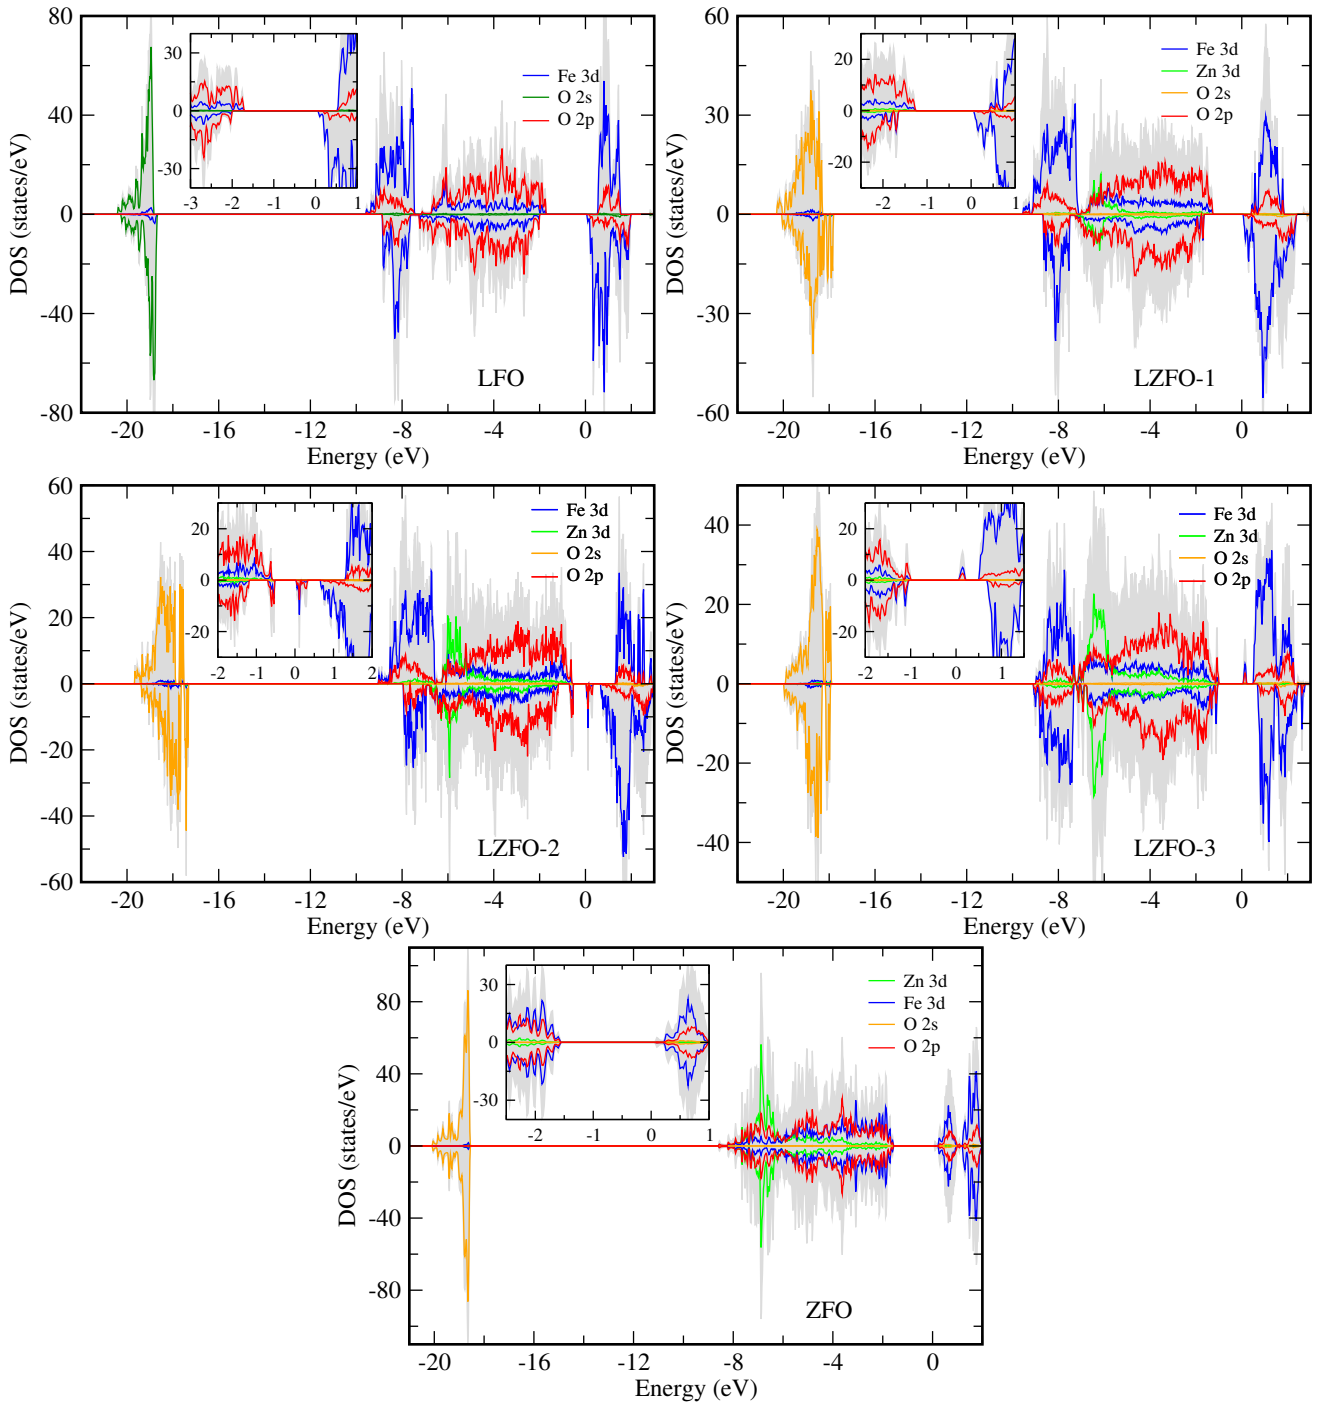

Fig. S5 Atom-projected density of states for  $\text{Li}_{1-x}\text{Zn}_{2x}\text{Fe}_{5-x}\text{O}_8$  ( $x = 0, 0.25, 0.5, 0.75, 1$ ), where positive values indicate spin up states and negative ones represent spin down states.

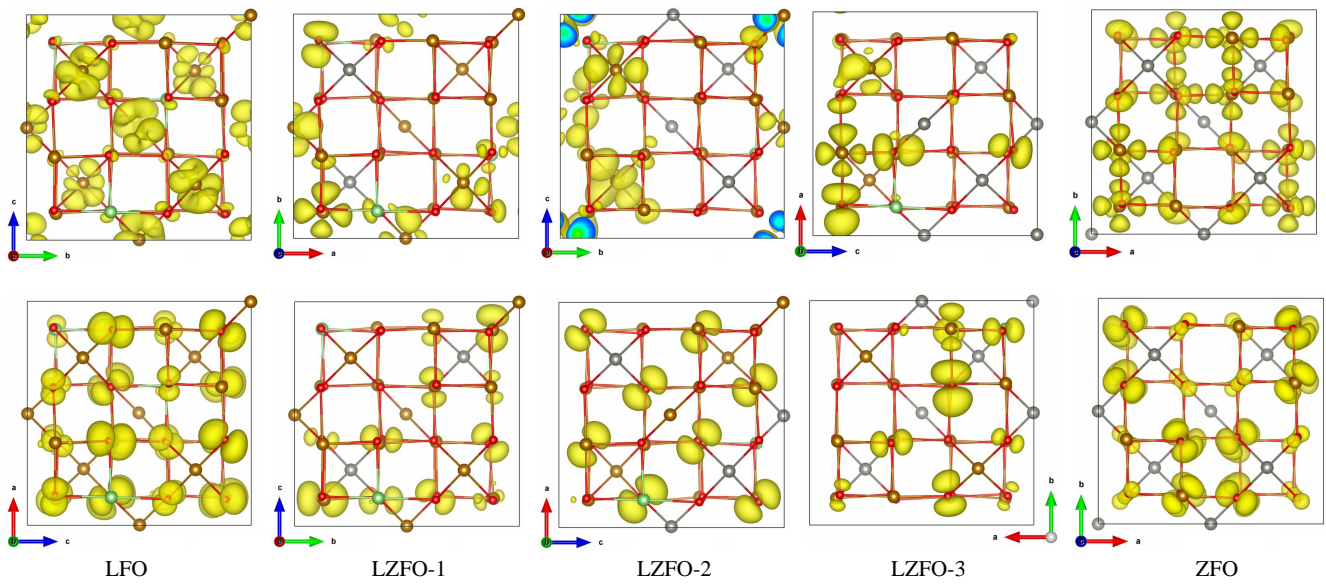

Fig. S6 Squared wave functions corresponding conduction band minimum (top) and valence band maximum (bottom) for spin up configuration in  $\text{Li}_{1-x}\text{Zn}_{2x}\text{Fe}_{5-x}\text{O}_8$  ( $x = 0, 0.25, 0.5, 0.75, 1$ ).

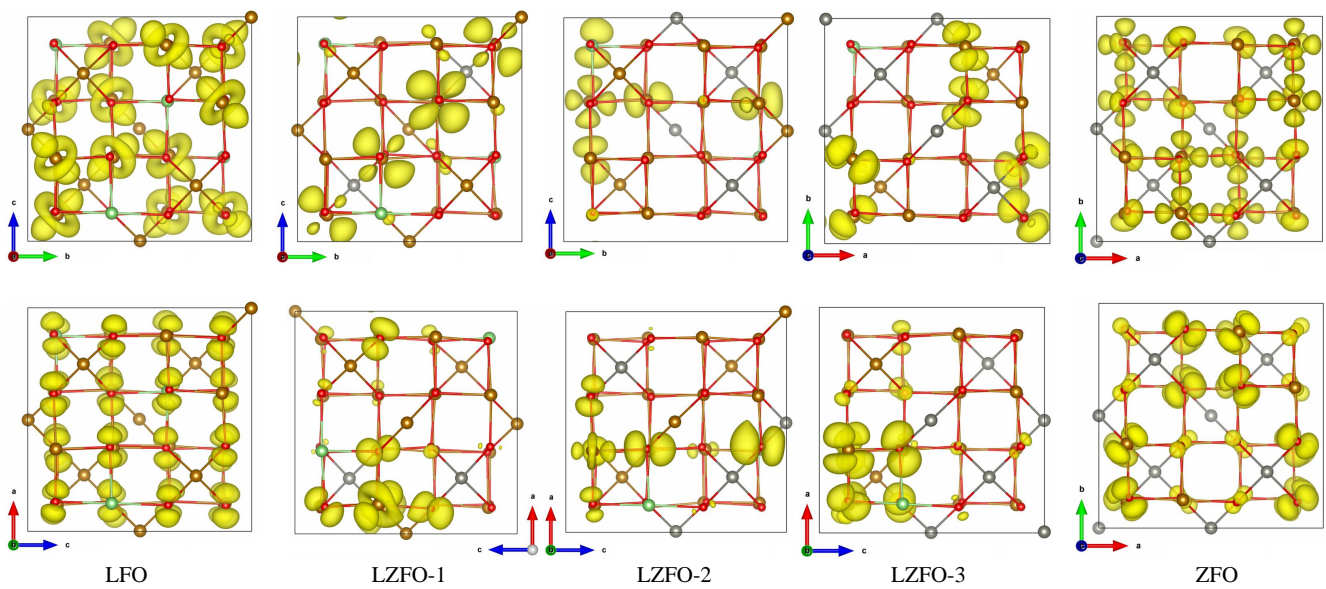

Fig. S7 Squared wave functions corresponding conduction band minimum (top) and valence band maximum (bottom) for spin down configuration in  $\text{Li}_{1-x}\text{Zn}_{2x}\text{Fe}_{5-x}\text{O}_8$  ( $x = 0, 0.25, 0.5, 0.75, 1$ ).

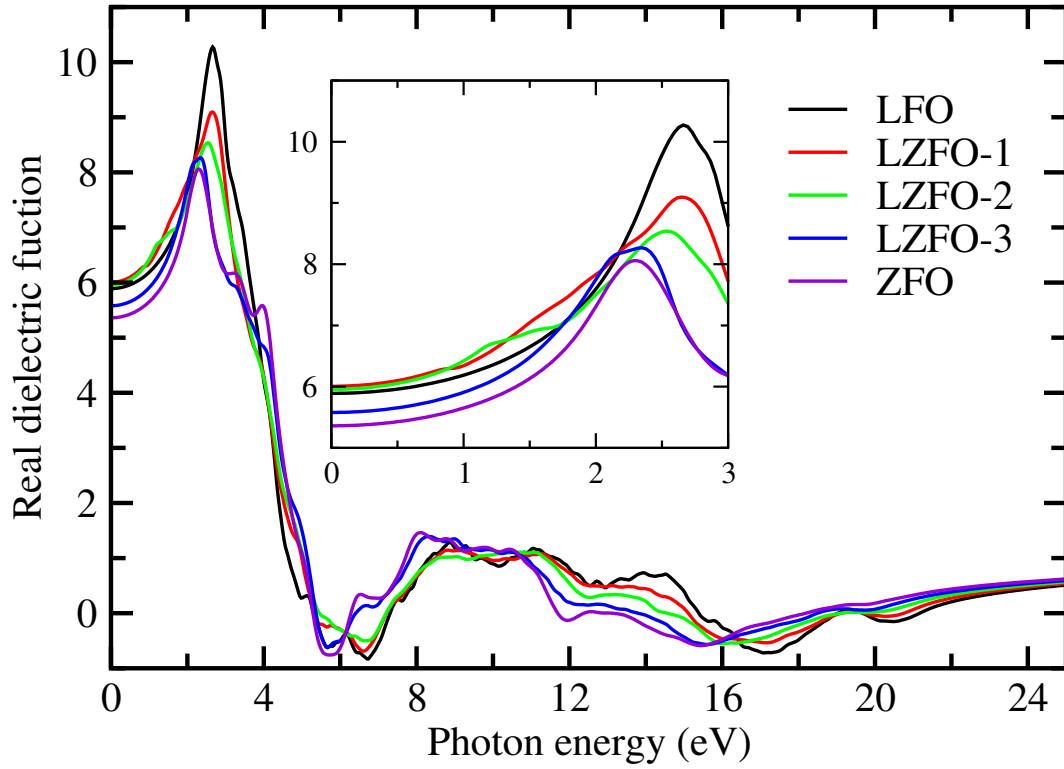

Fig. S8 Real part of frequency-dependent dielectric function  $\epsilon(\omega)$  in  $\text{Li}_{1-x}\text{Zn}_{2x}\text{Fe}_{5-x}\text{O}_8$  ( $x = 0, 0.25, 0.5, 0.75, 1$ ).

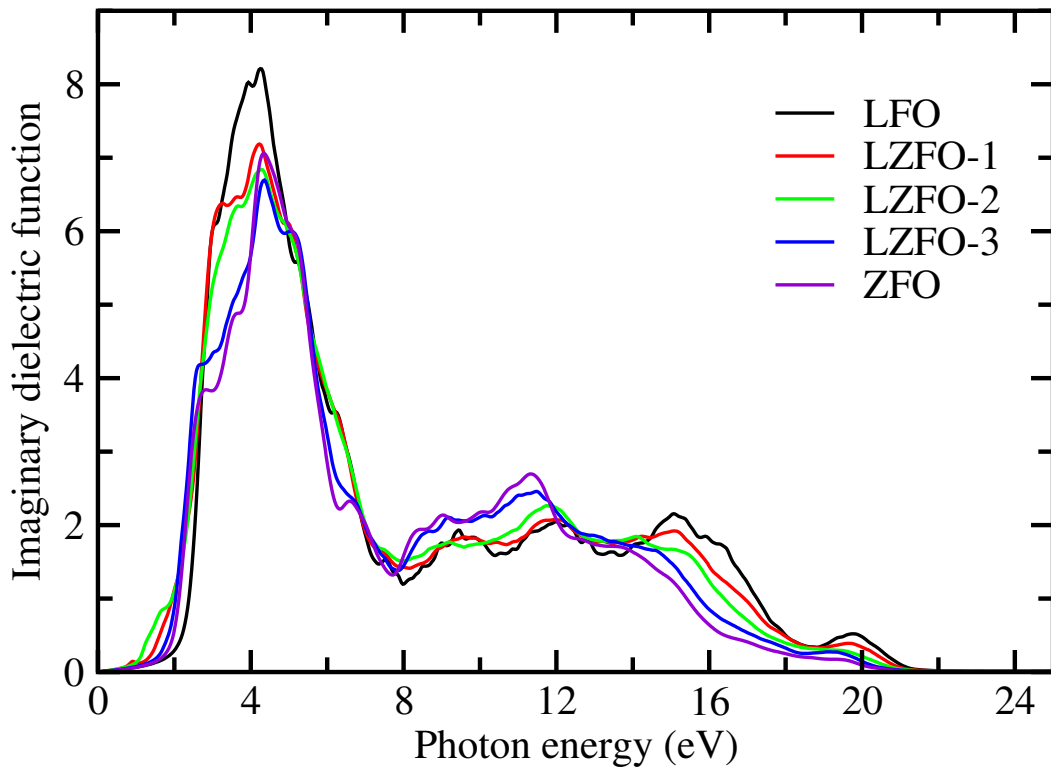

Fig. S9 Imaginary part of frequency-dependent dielectric function  $\epsilon(\omega)$  in  $\text{Li}_{1-x}\text{Zn}_{2x}\text{Fe}_{5-x}\text{O}_8$  ( $x = 0, 0.25, 0.5, 0.75, 1$ ).

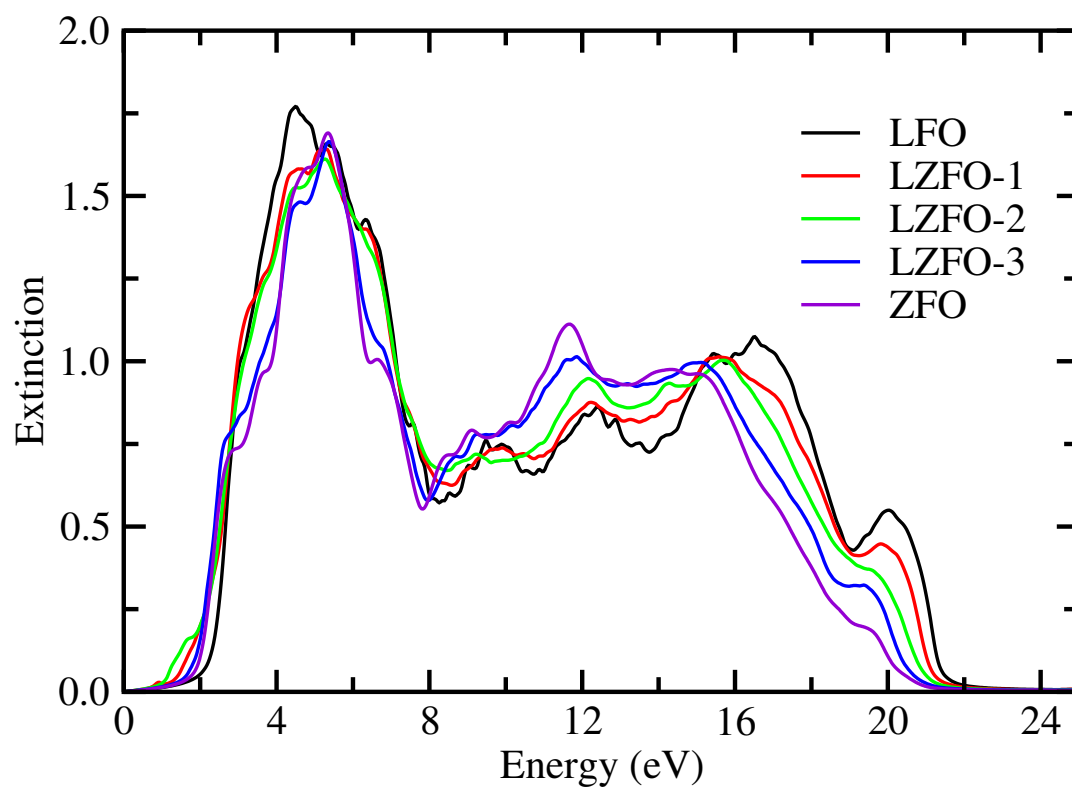

Fig. S10 Extinction coefficient in  $\text{Li}_{1-x}\text{Zn}_{2x}\text{Fe}_{5-x}\text{O}_8$  ( $x = 0, 0.25, 0.5, 0.75, 1$ ).
